# Supplementary material
Source: PubMed Central journal article supplement (PMC6817528)
Supplement: mmc3.pdf [file mmc3.pdf]

# Cellular Blebs and Membrane Invaginations Are Coupled through Membrane Tension Buffering

Ido Lavi,<sup>1,\*</sup> Mohammad Goudarzi,<sup>2</sup> Erez Raz,<sup>2</sup> Nir S. Gov,<sup>3</sup> Raphael Voituriez,<sup>1</sup> and Pierre Sens<sup>4</sup>

<sup>1</sup>Laboratoire Jean Perrin, UMR 8237 CNRS, Sorbonne University, Paris, France; <sup>2</sup>Institute of Cell Biology, Center for Molecular Biology of Inflammation, University of Münster, Münster, Germany; <sup>3</sup>Department of Chemical Physics, Weizmann Institute of Science, Rehovot, Israel; and <sup>4</sup>Institut Curie, PSL Research University, CNRS, UMR 168, Paris, France

**ABSTRACT** Bleb-type cellular protrusions play key roles in a range of biological processes. It was recently found that bleb growth is facilitated by a local supply of membrane from tubular invaginations, but the interplay between the expanding bleb and the membrane tubes remains poorly understood. On the one hand, the membrane area stored in tubes may serve as a reservoir for bleb expansion. On the other hand, the sequestering of excess membrane in stabilized invaginations may effectively increase the cell membrane tension, which suppresses spontaneous protrusions. Here, we investigate this duality through physical modeling and *in vivo* experiments. In agreement with observations, our model describes the transition into a tube-flattening mode of bleb expansion while also predicting that the blebbing rate is impaired by elevating the concentration of the curved membrane proteins that form the tubes. We show both theoretically and experimentally that the stabilizing effect of tubes could be counterbalanced by the cortical myosin contractility. Our results largely suggest that proteins able to induce membrane tubulation, such as those containing N-BAR domains, can buffer the effective membrane tension—a master regulator of all cell deformations.

**SIGNIFICANCE** Many essential cell processes are characterized by the apparent expansion of the plasma membrane. Because the membrane is practically inextensible, cells accommodate shape changes by storing the membrane area in fluctuations, ruffles, microvilli, and various invaginations. In this work, we investigate how bleb-type protrusions expand by drawing area from either fluctuations or tubular invaginations. A quantitative framework is derived to understand how the formation of protrusions can be regulated through the structuring of the excess membrane area. We highlight the important role played by the curved membrane proteins that form the invaginations.

## INTRODUCTION

Cellular blebs are protruding hemispherical bulges that form rapidly after local uncoupling of the plasma membrane from the cortical cytoskeleton (1–3). Protrusions of this type are instrumental in cellular processes, such as apoptosis, mitosis, and motility. The formation of blebs is driven by the intracellular hydrostatic pressure generated by actomyosin contractility (4–7). Theoretical models of bleb initiation have thus far considered the membrane-cortex adhesion and the membrane tension as the forces that act against the detachment and deformation of the bulging membrane (8–13). Although these parameters are indeed important, the common description of the membrane as a

flat interface fails to represent the seemingly more complex expansion mechanism. Given that stretching a flat plasma membrane is limited to just 2–3% before rupture (14,15) and that this extension requires a force that cells cannot generate (16), bleb expansion was suggested to depend on a local supply of membrane (16–19). Such area exchange affects the stress-strain relationship of the plasma membrane in a manner that remains poorly understood. This stress-strain (or tension-expansion) relationship is an important aspect of bleb formation (20) and of all other cellular processes in which plasma membrane mechanics play a crucial role.

In a recent study (21), some of us investigated the *in vivo* motility of primordial germ cells (PGCs) in the zebrafish embryo. These cells migrate toward their target, the developing gonad, employing blebs as forward protrusions (22–25). We found that the rapid membrane expansion associated with blebs relies on the local flattening of

Submitted December 21, 2018, and accepted for publication August 1, 2019.

\*Correspondence: [ido.lavi@etu.upmc.fr](mailto:ido.lavi@etu.upmc.fr)

Editor: Markus Deserno.

<https://doi.org/10.1016/j.bpj.2019.08.002>

© 2019 Biophysical Society.

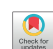

inwards-pointing tubular invaginations (or tubes) of the plasma membrane. Previous works suggest that cell membrane tubes may be formed and stabilized via a scaffolding mechanism involving crescent-shaped BAR domain proteins (26–29) (for reviews see (30–33)). Depending on their concentration, N-BAR proteins were shown to act both as membrane curvature sensors as well as curvature inducers (28,34). Accordingly, in our experiments (21), we were able to track the membrane tubes by expressing the YFP-labeled Amph-N-BAR. At a low concentration, N-BAR served purely as a tubes sensor and had no effect on the blebbing capacity nor the motility of PGCs. At high concentrations of N-BAR, an increase in tubular membrane invaginations and thus an increase in membrane area sequestered within them was observed. Strikingly, this manipulation also resulted in impaired blebbing and defective migration. Whereas the apparent membrane reservoir for bleb expansion increased, the blebbing activity markedly decreased.

Motivated by this puzzle, we propose in this article a simplified physical description of membrane tubulation by curved proteins, coupled to the thermodynamics of bleb formation. In our model, we formulate the free energy of the membrane and the bound proteins that form scaffolds for membrane tubes. Discarding dynamics, we minimize this energy sequentially on a timescale hierarchy. Through this minimization, we calculate analytically both the folded membrane area and the effective membrane tension. We then show quantitatively how these properties control the expansion mechanism and the probability of bleb initiation. Our model yields a parametric regime under which cells could, in principle, regulate their blebbing activity through the expression of tube-forming proteins (such as N-BAR). A qualitative comparison with previous observations suggests that this regime is likely relevant to wild-type (WT) PGCs in the embryo. The model further provides another experimentally accessible prediction, namely that blebbing could be rescued post-N-BAR overexpression by elevating the myosin contractility. We were able to verify this prediction qualitatively in new *in vivo* experiments.

## MODEL

### Membrane tubes and expanding bleb are coupled by membrane tension

We begin by introducing our central hypothesis, which couples the tubular invaginations with the protruding bleb. This coupling is based on the area dependence of the membrane tension  $\sigma$ . In simple membrane systems such as giant vesicles, the membrane tension is primarily of entropic origin and is nonlinearly (exponentially) related to the “excess area,” broadly defined as the relative difference between the true membrane area (related to the number of lipid molecules) and the “apparent area”: the surface area of the

average vesicle’s shape, which excludes thermal fluctuations (35). Conditions that increase the apparent area under constant true area, such as an hypo-osmotic shock, increase the membrane tension by flattening out thermal fluctuations. Such a simple relationship does not exist for cells, in which the membrane interact with the cytoskeleton and experiences active fluctuations in addition to the thermal ones (36). One may nevertheless expect that processes that increase the apparent cell membrane area, such as membrane tubulation and bleb formation, should also lead to an increase of membrane tension. To capture this at the phenomenological level, we postulate the following relationship between the cell membrane tension  $\sigma$ , the area held in tubes  $S_t$ , and the increase of (apparent) cell membrane area associated to bleb formation  $\Delta S_b$ :

$$\sigma = \sigma_0 + k_\sigma \frac{S_t + \Delta S_b}{A}, \quad (1)$$

where  $\sigma_0$  is the tension in a reference state with neither tubes nor a bleb,  $k_\sigma$  is an effective stretching modulus, and  $A$  is the area over which tension may be considered uniform. If tension equilibrates fast,  $A$  is the entire cell area. However, it has recently been shown that the cell membrane resists flow, possibly because of its tight interaction with the cytoskeleton (37), so that  $A$  could be restricted to the cortex-detached region underneath an expanding bleb. The phenomenological relationship is chosen to be linear for simplicity. Taking into account possible nonlinearities associated to large variations of the apparent cell membrane area (e.g., during the expansion of large blebs) would require introducing additional phenomenological parameters. We stress that many factors could plausibly affect  $\sigma_0$  and  $k_\sigma$ , including the linkage of the membrane to the cytoskeleton (38). In our model, we treat both as constant parameters.

At equilibrium, meaning the stabilized folded state with no bleb, the membrane tension is an increasing function of the folded area,  $S_t$ , which is induced by the curved proteins (see Fig. 1 *a*). When the bleb does form, after the local membrane-cortex detachment, this heightened tension is the restoring force that acts against the deformation of the membrane (see Fig. 1 *c*). Thus, the bleb’s energy should be expected to grow as a function of the concentration of the curved protein. Notwithstanding, membrane area can be merely converted from the inward pointing tubules to the expanding bleb, such that no restoring work would be done by the membrane tension (see Fig. 1, *b* and *d*). Nevertheless, this expansion by means of unfolding (or tube flattening) presents its own free energy cost associated with dispersing the curved protein scaffolds that form the tubules. To accommodate the initial expansion of the bleb, the system minimizes its total free energy by paying with one energetic currency or another or possibly an optimized fraction of both stretching the membrane (that is, seizing area from fluctuations) and unfolding the membrane

## Tubulation by curved proteins (equilibrium state)

**a** Maximal tubulation  $\sigma s < \epsilon \rightarrow \phi_t = \phi$ 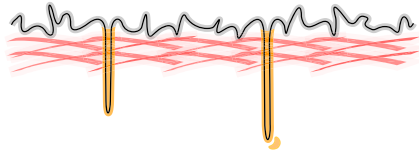**b** Saturated tubulation  $\sigma s = \epsilon \rightarrow \phi_t = (\epsilon - \sigma_0 s)/k_G s$ 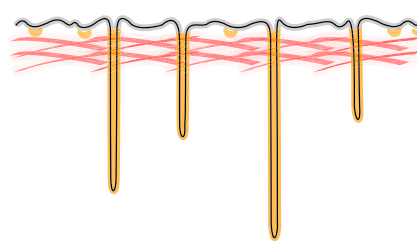

## Bleb expansion

**c** Stretching fluctuations (restoring work by tension)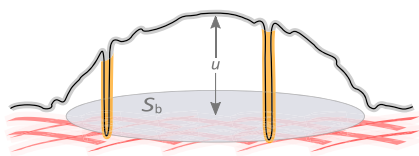**d** Tube-flattening (dispersing protein aggregates)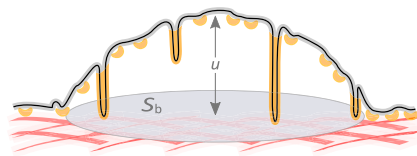

**FIGURE 1** System illustration. The equilibrium state of the membrane under the regimes of low and high protein surface fraction is illustrated in figures (a) and (b), respectively. Figures (c) and (d) illustrate the initial expansion of the bleb, which bulges out of the equilibrium states (a) and (b), respectively. The gray-highlighted curve represents the “true” membrane area, including the thermal and active membrane fluctuations. The orange-highlighted curve represents  $S_t$ , the membrane area held in tubes. The small banana-shaped components (orange) depict N-BAR proteins. The red mesh represents the underlying actin cortex. The increase of apparent area due to bleb formation is  $\Delta S_b = \pi u^2$ . To see this figure in color, go online.

(releasing the area held in stabilized invaginations). Our model incorporates both of these processes, which are physically coupled through the area dependence of the membrane tension (Eq. 1).

## Tubulation by curved membrane proteins

Although the cell membrane is clearly an out-of-equilibrium system, models based on equilibrium thermodynamics have proven valuable to understand aspects of membrane proteins self-aggregation of high physiological relevance (39). In this section, we propose such a model to determine the configuration of the membrane-bound curved proteins and the area stored in tubes at equilibrium and throughout the expansion of the bleb. We stress that our minimal aggregation model does not deal with the specifics of the N-BAR interaction with the membrane. We thus refer the reader to previous theoretical models (e.g., (40–42)) and molecular dynamics simulations (43–49) that describe this process at the molecular level. Here, our aim is to provide a simplified coarse-grained description of the equilibrated state of the membrane and to highlight the effect of tension buffering by tubulating proteins. Thus, our approach also differs from previous continuum models that have either focused solely on the onset of spontaneous tubulation (50) or described the enrichment of curved proteins on pre-existent (mechanically pulled) membrane tubes (51).

There exists direct experimental evidence that, at a high concentration, N-BAR proteins such as amphiphysin (51) and endophilin (52) can form protruding tubes on reconstituted membranes (giant vesicles). These tubes are enriched in N-BAR proteins and coexist with (almost) flat membrane regions. Similarly, in PGCs, we have observed membrane tubes pointing inwards from relatively flat regions (see Fig. 3 A and Video S3 in (21)). Thus, in our model, we consider membrane-bound proteins that can be either iso-

lated on a flat membrane or aggregated on dense scaffolds that form stable membrane tubes. Note that this assumption naturally breaks down in several cases, e.g., in the limit of high temperature (as explained in Supporting Materials and Methods) or high tension and small system sizes that would not permit co-existence of tubes and flat membrane (53). The number of isolated proteins is given by  $n_1 = \rho_1 A$  and the number of  $p$ -sized aggregates (tubes) is given by  $n_p = \rho_p A$  (where  $\rho_1$  and  $\rho_p$  are uniform coarse-grained densities). We assume that the folded area held in each  $p$ -sized tube is  $ps$ , where  $s$  is the folded membrane area per protein. We also fix the protein surface fraction on tubes to unity to reduce the number of parameters. Accordingly, the tubes hold a total area of  $S_t = A \sum_{p \geq p_c} \rho_p ps$  (where  $p_c$  is

a critical protein number for forming a tube cap), and the number of translational sites is  $A/s$ . In Eq. 2, we present the free energy associated with the curved proteins and the membrane tubes, including the work done by the membrane tension against the formation of the tubes and the expansion of the bleb. Note that the energy associated with membrane-cortex binding and the work done by the hydrostatic pressure will be considered later on in the analysis of the complete bleb energy.

$$F_t = A \left( \rho_1 \log \frac{\rho_1 s}{e} + \sum_{p \geq p_c} \rho_p \log \frac{\rho_p s}{e} \right) + A \sum_{p \geq p_c} \rho_p (E_{\text{cap}} - \epsilon p) + \int_0^{S_t + \Delta S_b} \left( \sigma_0 + \frac{k_\sigma S}{A} \right) dS \quad (2) + \mu A \left( \rho_1 + \sum_{p \geq p_c} \rho_p p \right)$$

This formulation of  $F_t$  contains four essential contributions, given in units of  $k_B T$ . The first term comes from

the translational entropy of all surface species (i.e., isolated proteins and tubes) (to lowest order in  $\rho_1 s$  and  $\rho_p s$ ). The second term accounts for the energy cost of forming the tube caps ( $E_{\text{cap}}$  per tube of any size) as well as the energy gain of aggregating proteins onto the tubular scaffolds ( $\varepsilon$  per recruited protein, accounting for any per-protein difference in the protein binding/membrane bending energy). The third term accounts for the restoring work done by varying the membrane tension against the extension of the tubes and the bleb (see Eq. 1). In effect, because of total membrane conservation (which is represented phenomenologically by Eq. 1), the area  $S_t + \Delta S_b$  is drawn from thermal and active membrane fluctuations. Last, in the fourth term,  $\mu$  denotes a Lagrange multiplier that fixes the total number of membrane-bound proteins. The parameters of this model ( $s$ ,  $\sigma_0$ ,  $k_\sigma$ ,  $\varepsilon$ , and  $E_{\text{cap}}$ ) are estimated in Table 1.

We first minimize  $F_t$  with respect to the densities of isolated proteins and tubes (assuming  $\rho_1$  and  $\rho_p$  are fast variables compared to the bleb expansion  $\Delta S_b$ ):

$$0 = \frac{\partial F_t}{\partial \rho_1} \rightarrow \rho_1 = \frac{1}{s} e^{-\mu}, \quad 0 = \frac{\partial F_t}{\partial \rho_p} \rightarrow \rho_p = \frac{1}{s} e^{-E_{\text{cap}} - (-\varepsilon + \sigma s + \mu)p}, \quad (3)$$

where  $\sigma = \sigma_0 + k_\sigma (\phi_t + \Delta S_b/A)$ , and  $\phi_t = S_t/A$  is the surface fraction of proteins belonging to tubes (see Supporting Materials and Methods for detailed derivation).

The conservation of the total protein number is given by the following:

$$\phi = \phi_1 + \phi_t = s\rho_1 + s \sum_{p \geq p_c} \rho_p p = e^{-\mu} + e^{-E_{\text{cap}}} \frac{e^{(1-p_c)(-\varepsilon + \sigma s + \mu)} (1 + (e^{-\varepsilon + \sigma s + \mu} - 1)p_c)}{(e^{-\varepsilon + \sigma s + \mu} - 1)^2}, \quad (4)$$

where  $\phi$  is the total protein surface fraction, and  $\phi_1$  denotes the surface fraction of isolated proteins.

The conservation condition (Eq. 4) defines the Lagrange multiplier  $\mu$  as a function of  $\phi$ , with the closed nonlinear relationship obtained by substituting  $\phi_t = \phi - e^{-\mu}$  back in  $\sigma$ . Unfortunately, we cannot extract  $\mu$  explicitly from this implicit equation. Yet, in the limit  $E_{\text{cap}} \gg 1$ —which is in agreement with our estimation in Table 1—we find numerically that  $\mu(\phi)$  exhibits a sharp transition between two solvable asymptotic cases, namely: 1) at low  $\phi$ , the surface fraction of isolated proteins  $\phi_1$  dominates over the surface fraction of proteins belonging to tubes  $\phi_t$ , and 2) at higher  $\phi$ , the fraction  $\phi_t$  (last term on the right hand side) will start to dominate. The mathematical treatment, detailed in Supporting Materials and Methods, further reveals that when  $E_{\text{cap}}$  is the largest energy scale (as we indeed estimate),  $\mu$  practically loses a quantitative dependency on both  $E_{\text{cap}}$  and  $p_c$ . Ultimately, we obtain an explicit piecewise approximation of  $\phi_t$ :

$$\phi_t = \phi - e^{-\mu(\phi)} \simeq \begin{cases} 0 & \phi < \phi^* \\ \phi - \frac{1}{k_\sigma s} W \left( k_\sigma s e^{-k_\sigma s \left( \frac{\varepsilon - \sigma_0 s}{k_\sigma s} - \frac{\Delta S_b}{A} - \phi \right)} \right) & \phi > \phi^* \end{cases}, \quad (5)$$

where  $W(x)$  denotes the product log (Lambert function) and the crossover point of the two asymptotic limits (i.e., the point at which  $\mu_{\phi=\phi_1} = \mu_{\phi=\phi_t}$ ) is, in this  $E_{\text{cap}} \gg 1$  approximation,

$$\phi^* = e^{-(\varepsilon - \sigma_0 s - k_\sigma s \Delta S_b/A)} \quad (6)$$

It is clear from Eq. 5 that  $\phi^*$  represents a critical protein surface fraction for the onset of tubulation (corresponding to a critical density of proteins  $\phi^*/s$ ). Note that this result is reminiscent of the “critical budding concentration” of the membrane proteins that induce caveolae, which are a

**TABLE 1** Quantitative Estimates of Our Tubulation Model Parameters

| Description                           | Symbol           | Estimate            | Units            | References/Comments                                                                                                                                                                                               |
|---------------------------------------|------------------|---------------------|------------------|-------------------------------------------------------------------------------------------------------------------------------------------------------------------------------------------------------------------|
| N-BAR surface area on membrane        | $s$              | 30–50               | nm <sup>2</sup>  | (28,59)                                                                                                                                                                                                           |
| Membrane tension (without tubes)      | $\sigma_0$       | 10 <sup>−4</sup> –1 | pN/nm            | (35,36,60)                                                                                                                                                                                                        |
| Effective membrane stretching modulus | $k_\sigma$       | 0.1–10              | pN/nm            | This phenomenological parameter is expected to be much smaller than the stretching modulus of pure lipid bilayer in the elastic regime ( $\approx 100$ pN/nm) because of thermal and active fluctuations (35,61). |
| N-BAR affinity to tubes               | $\varepsilon$    | 10–100              | k <sub>B</sub> T | As a rough estimate, we consider the gain in the elastic energy of the membrane associated with clustering isolated N-BAR scaffolds (42,62).                                                                      |
| Energy of tube cap                    | $E_{\text{cap}}$ | 100–600             | k <sub>B</sub> T | As a rough estimate, we consider the bending energy of a hemisphere, $4\pi K_c$ , where $K_c \sim 10$ –50 k <sub>B</sub> T is the bending stiffness (63,64).                                                      |

With  $k_B T \approx 4$  pN/nm, we obtain  $\sigma_0 s \approx 10^{-3} - 10$  k<sub>B</sub>T, and  $k_\sigma s \approx 1 - 100$  k<sub>B</sub>T.

spherical type of membrane invaginations (54). Also note that Eqs. 5 and 6 in essence depend only on three contracted parameters:  $(\varepsilon - \sigma_0 s)$ ,  $k_\sigma s$ , and  $\phi$  as well as one additional variable:  $\Delta S_b/A$ .

## RESULTS

### Tubulation

Using Eqs. 5 and 6, we can compute the total folded area,  $S_t = A\phi_t$ , as well as the membrane tension,  $\sigma = \sigma_0 + k_\sigma (\phi_t + \Delta S_b/A)$ , for any set of parameters and any given bleb expansion. We first interpret the equilibrium result and then analyze how it is altered by the expanding bleb.

#### The equilibrium (prebleb) state

We focus on  $\phi_t^{\text{eq}}$ , the surface fraction of proteins belonging to tubes at equilibrium (i.e., with  $\Delta S_b = 0$ ). To gain insight into Eq. 5, we briefly examine the limits  $(\varepsilon - \sigma_0 s) \gg 1$  and  $k_\sigma s \gg 1$  (completely negligible entropy). First, we find that  $\phi^* \rightarrow 0$  and thus,

$$\begin{aligned} \phi_t^{\text{eq}} &\approx \phi - \lim_{k_\sigma s \rightarrow \infty} \frac{1}{k_\sigma s} W\left(k_\sigma s e^{-k_\sigma s \left(\frac{\varepsilon - \sigma_0 s}{k_\sigma s} - \phi\right)}\right) \\ &= \begin{cases} \phi & \phi < \frac{\varepsilon - \sigma_0 s}{k_\sigma s} \\ \frac{\varepsilon - \sigma_0 s}{k_\sigma s} & \phi > \frac{\varepsilon - \sigma_0 s}{k_\sigma s} \end{cases} \quad (7) \end{aligned}$$

This result is expected and could be understood as follows. At low protein surface fraction ( $\phi < (\varepsilon - \sigma_0 s)/k_\sigma s$ ), the energetic gain of protein aggregation onto a few established tubes (of size  $p > E_{\text{cap}}/(\varepsilon - \sigma_0 s)$ ) dominates over the work that is done by the membrane tension against the per-protein extension of tubes ( $\varepsilon > \sigma s$ ). Because all added proteins are recruited to the tubes, we find that  $\phi_t \approx \phi$  in this limit (see Eq. 7; Fig. 1 a). However, as the amount of tube-forming proteins is increased, so does the folded area ( $S_t = A\phi_t$ ), which increases the membrane tension in accordance with our underlying assumption (Eq. 1). When this tension balances out the protein aggregation energy (i.e., when  $\sigma s \approx \varepsilon$ , corresponding to  $\phi_t \approx (\varepsilon - \sigma_0 s)/k_\sigma s$ ), any additional protein aggregation will not be energetically preferable (see Eq. 7; Fig. 1 b). Thus, the equilibrated  $\phi_t$  and the membrane tension  $\sigma$  tend to saturate as a function of  $\phi$ . The transition between the regimes of maximal tubulation ( $\phi_t = \phi$ ) and saturated tubulation ( $\phi_t = (\varepsilon - \sigma_0 s)/k_\sigma s$ ) is smoothed out when increasing the relative weight of entropy (decreasing  $(\varepsilon - \sigma_0 s)$  and  $k_\sigma s$  proportionally) because that enhances the tendency to mix the distinguishable densities (isolated proteins and tubes of all sizes) at a high protein concentration. At a low protein concentration, the translational entropy favors isolated proteins over those clustered into large tubules. Thus, a decrease in  $(\varepsilon - \sigma_0 s)$  increases the critical density  $\phi^*$  for the onset of tubulation. All

of these effects can be inferred from Fig. 2, where the black curves represent  $\phi_t^{\text{eq}} = \phi_t(\Delta S_b = 0)$  using Eq. 5.

Using the numerical estimates of the parameters given in Table 1, we find that the aggregation of proteins into membrane tubes can increase the cell membrane tension up to a maximal value  $\varepsilon/s \approx 1 - 10 \text{ pN/nm}$ , corresponding to the saturation regime. This is a high value, which can exceed the membrane rupture tension. The saturation regime can be reached if the surface fraction of protein exceeds a value of order  $\varepsilon/(k_\sigma s)$ , which can be as low as 10%. For a lower composition, the system is in the regime of maximal tubulation; increasing the protein density by an amount  $\Delta\phi$  leads to an increase of the membrane tension by  $k_\sigma \Delta\phi$ , which reach 1 pN/nm for  $\Delta\phi = 10\%$ . We reiterate that these values should be considered as crude estimates because of the large uncertainty regarding the value of the effective stretching modulus  $k_\sigma$ . Nevertheless, they show that the effect of tube-forming proteins on the cell membrane tension can be highly physiologically significant.

#### The bleb state

The bleb expansion effectively increases the tension (Eq. 1), making the extension of tubes more costly. Therefore, we find that  $\phi_t$  decreases as a function of  $\Delta S_b$  (see orange curves in Fig. 2). Specifically, the limit at which the tension balances out the aggregation energy ( $\sigma s \approx \varepsilon$ ) corresponds to a lower saturation threshold for  $\phi_t$  (see Fig. 2, a1 and a2). The change in the total folded area,  $\Delta S_t = A(\phi_t^{\text{eq}} - \phi_t)$ , is the tube-flattened area that accounts for a fraction of  $\Delta S_b$  (proportional to the orange vertical gaps in Fig. 2). The remaining expansion area,  $\Delta S_b - \Delta S_t = A((\Delta S_b/A) + \phi_t - \phi_t^{\text{eq}})$ , is drawn from fluctuations (membrane stretching, proportional to the blue vertical gaps in Fig. 2). Given  $\phi > \phi^*$ , we may approximate, to first order in  $\Delta S_b$ , the tube-flattened area and the stretched area:

$$\begin{aligned} \Delta S_t &\approx -A \left. \frac{d\phi_t}{d\Delta S_b} \right|_{\Delta S_b=0} \Delta S_b = \frac{k_\sigma s \phi_1^{\text{eq}}}{k_\sigma s \phi_1^{\text{eq}} + 1} \Delta S_b, \\ \Delta S_b - \Delta S_t &\approx \frac{1}{k_\sigma s \phi_1^{\text{eq}} + 1} \Delta S_b, \end{aligned} \quad (8)$$

where  $\phi_1^{\text{eq}} = \phi - \phi_t^{\text{eq}} \approx (1/k_\sigma s) W(k_\sigma s e^{-k_\sigma s ((\varepsilon - \sigma_0 s)/k_\sigma s - \phi)})$  is the surface fraction of isolated proteins at equilibrium. We find that there is a sharp transition in the mechanism of the initial bleb expansion, from stretching out fluctuations to flattening the tubes (illustrated in Fig. 1, c and d). This transition occurs at  $\phi \approx (\varepsilon - \sigma_0 s)/k_\sigma s$ , the limit at which the protein surface fraction belonging to tubes ( $\phi_t^{\text{eq}}$ ) and the membrane tension ( $\sigma^{\text{eq}} = \sigma_0 + k_\sigma \phi_1^{\text{eq}}$ ) saturate (see Eq. 7; Fig. 2 a). As expected, an increase in the stiffness modulus  $k_\sigma$ , which increases the energetic cost of stretching out fluctuations, results in favoring the expansion via tube flattening. The effect of increasing  $(\varepsilon - \sigma_0 s)$  is precisely

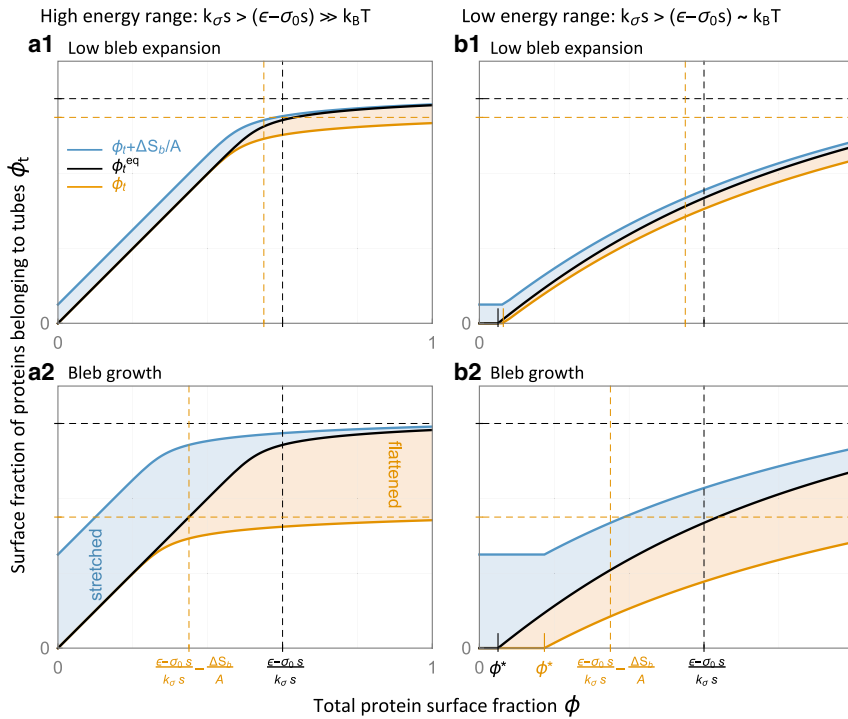

**FIGURE 2** Tubulation by curved proteins and the bleb tubes fluctuations area exchange. All plots are for  $E_{\text{cap}} \gg 1$ , as in Eqs. 5 and 6. In each plot, we present  $\phi_t^{\text{eq}}$  (black line),  $\phi_t$  in the bleb state (orange line), and  $\phi_t + \Delta S_b/A$  (blue line, also proportional to the tension,  $\sigma = \sigma_0 + k_\sigma(\phi_t + \Delta S_b/A)$ ) as functions of  $\phi$  (see Eq. 5). The vertical gap between the black and orange curves (light orange region) is proportional to the tube-flattened area, and the vertical gap between the blue and black curves (light blue region) is proportional to the stretched area (seized from membrane fluctuations). The dependence on  $(\epsilon - \sigma_0 s)$  and on  $k_\sigma s$  is indicated by the dashed grid lines (saturation limits) and the ticks that mark the critical density for tubulation,  $\phi^*$  (Eq. 6), at equilibrium (black), and in the bleb state (orange). The entropic effects that arise from increasing the temperature (or decreasing all energy parameters proportionally) can be inferred from the different plots. In plots (a1) and (a2), the entropic effects are negligible because  $(\epsilon - \sigma_0 s) \gg 1$  (specifically,  $(\epsilon - \sigma_0 s) = 30$  and  $k_\sigma s = 50$ , well within our estimations in Table 1). In plots (b1) and (b2), where  $(\epsilon - \sigma_0 s) \sim 1$  (specifically,  $(\epsilon - \sigma_0 s) = 3$  and  $k_\sigma s = 5$ ), one may notice a finite critical density for tubulation,  $\phi^* > 0$ , as well as a smoother transition into saturation. The dependence on bleb growth can be inferred from plots (a2) and (b2), where  $\Delta S_b/A$  is increased to 25% from 5% in plots (a1) and (b1). To see this figure in color, go online.

the opposite because a higher energetic gain for protein aggregation stabilizes the membrane tubules.

### The bleb nucleation energy

In this section, we first present the complete energy of a bleb that bulges out from the equilibrium state (folded membrane adhered to the cortex, see Fig. 1, *a* and *b*). We then use this expression to derive the energy barrier that limits the nucleation of blebs.

A compelling depiction of bleb formation as a nucleation process was first suggested in (8). In their treatment, Charras et al. began by minimizing the bleb energy with respect to curvature—ensuring normal force balance on the detached membrane (the Young-Laplace condition). They then found that the minimized bleb energy exhibits a nonmonotonic dependency on the cortex-detached area; the energy first increases with the membrane detachment and beyond some critical size it decreases, making it energetically preferable to form the macroscopic bleb. The maximal energy that corresponds to the critical detachment is thus interpreted as the energetic barrier for bleb nucleation. Here, we extend this fundamental description by coupling it directly to the total free energy associated with the membrane tubes and the curved proteins (Eq. 2).

The total energy difference between the bleb state and the equilibrium (prebleb) state is given by the following:

$$E_b = -PV_b + JS_b + \Delta F_t \quad (9)$$

where  $P$  is the hydrostatic pressure driven by actomyosin contractility,  $V_b$  is the inflated bleb volume,  $J$  is the membrane-cortex adhesion strength,  $S_b$  is the cortex-detached area (the base of the bleb, see Fig. 1), and  $\Delta F_t$  is the difference in the free energy of the membrane and the curved proteins that results from the bleb expansion. It is calculated from the variation of the free energy  $F_t$  in Eq. 2, upon variation of the bleb expansion area from zero to  $\Delta S_b$ . We assume that the tubular proteins equilibrate fast compared to the dynamics of bleb expansion so that the densities  $\rho_1$  and  $\rho_p$  are given by Eq. 3. As we are interested in bleb nucleation, we consider the shallow bleb limit ( $u^2/S_b \ll 1$ , where  $u$  is the maximal height of the bleb, see Fig. 1), for which  $\Delta S_b \approx \pi u^2$  and  $V_b \approx S_b u/2$ . Assuming  $S_b > K_c/\sigma$  (where  $K_c$  is the bending rigidity), we neglected in Eq. 9 the bending energy induced by the bleb deformation. Last, assuming that the change in tension is negligible during the nucleation stage of the bleb, we will also neglect contributions to  $\Delta F_t$  that are quadratic in  $\Delta S_b$  (quartic in  $u$ ).

For a given  $\Delta S_b$ , the minimized  $F_t$  can be expressed in terms of  $\phi_1$ ,  $\phi_t$  (see Eq. S16). As shown in Supporting Materials and Methods, we use this expression to derive the following:

$$\left. \frac{dF_t}{d\Delta S_b} \right|_{\Delta S_b=0} \approx \begin{cases} \sigma_0 & \phi < \phi^* \\ \sigma_0 + k_\sigma \phi_t^{\text{eq}} & \phi > \phi^* \end{cases} = \sigma^{\text{eq}} \quad (10)$$

This result entails important physical meaning regarding the stress-strain relationship of the cell membrane. In the

regime of low protein surface fraction (meaning  $\phi < (\epsilon - \sigma_0 s)/k_\sigma s$ ), the free energy cost of bleb expansion increases with  $\phi$  ( $\Delta F_t \approx \sigma^{\text{eq}} \Delta S_b = (\sigma_0 + k_\sigma \phi) \Delta S_b$ ). This is because the tubulating proteins effectively stiffen the membrane tension, which then works against the initial bleb expansion. In the regime of high protein surface fraction ( $\phi > (\epsilon - \sigma_0 s)/k_\sigma s$ ), the cost of bleb expansion is given by  $\Delta F_t \approx (\epsilon/s) \Delta S_b$ . In essence, this cost is attributed to unfolding the tubes (dispersing  $\Delta S_b/s$  proteins from tubular aggregates at the cost of  $\epsilon$  per protein). In other words, Eq. 10 concisely accounts for the transition between the two possible expansion mechanisms.

Substituting  $\Delta F_t = \sigma^{\text{eq}} \Delta S_b$  back in Eq. 9,

$$E_b = -PS_b u/2 + JS_b + \sigma^{\text{eq}} \pi u^2 \quad (11)$$

Following (8), we proceed by minimizing  $E_b$  with respect to the bleb height  $u$  (assuming that the detached area  $S_b$  is the slowest variable). It follows that  $u = (PS_b/4\pi\sigma^{\text{eq}})$  and  $E_b = -(P^2 S_b^2/16\pi\sigma^{\text{eq}}) + JS_b$ . The  $u$ -minimized bleb energy has a maximum at  $S_b^{\text{nuc}} = 8\pi\sigma^{\text{eq}}J/P^2$ . This maximum corresponds to an energy barrier, which we call the bleb nucleation energy:

$$E_b^{\text{nuc}} = 4\pi\sigma^{\text{eq}}J^2/P^2 \quad (12)$$

Note that  $u^{\text{nuc}} = 2J/P$  and  $\Delta S_b^{\text{nuc}} = 4\pi J^2/P^2$  are the bleb height and the bleb expansion area at the nucleation point. The result given in Eq. 12 is valid so long as our simplifying assumptions (shallow deformation, negligible bending energy of the bleb, and negligible change in tension) are met throughout the nucleation stage (see range of validity in Supporting Materials and Methods).

Large bleb expansion might eventually lead to the complete flattening of all tubes, if  $\Delta S_b$  is so large that  $\phi < \phi^*(\Delta S_b)$  (see Eq. 6)). We assume that this limit is not reached during the nucleation stage, which is valid provided that

$$\begin{aligned} \Delta S_b^{\text{nuc}} < \Delta S_b^* &\equiv A \frac{\log \phi + \epsilon - \sigma_0 s}{k_\sigma s} \\ \rightarrow J < PR_{\text{cell}} \sqrt{\frac{\log \phi + \epsilon - \sigma_0 s}{k_\sigma s}}, \end{aligned} \quad (13)$$

where here we considered that the area  $A$  is roughly  $4\pi R_{\text{cell}}^2$ .

## Model versus experiments

In this section, we discuss the relevance of our theory to the experiments. First, we infer which is the theoretical regime that bares the most qualitative resemblance to our previous observations. Second, we use the model to predict the consequences of performing two competing manipulations sequentially. We then verify this prediction in new in vivo experiments.

## Comparison with previous observations

Let us first recall two major findings from our previous experimental study (21), namely that the folded area held in tubes increases with N-BAR expression and that the blebbing frequency decreases with N-BAR expression. These observed responses are supported theoretically by the model if both  $S_t^{\text{eq}}$  (the equilibrium folded area) and  $E_b^{\text{nuc}}$  (the bleb nucleation energy) are increasing functions of the total protein density. Because  $S_t^{\text{eq}} = A\phi_t^{\text{eq}}$  and  $E_b^{\text{nuc}} = (4\pi J^2/P^2)(\sigma_0 + k_\sigma \phi_t^{\text{eq}})$ , these two requirements are met so long as  $\phi_t^{\text{eq}}$  is not saturated as a function of  $\phi$  (see black curves in Fig. 2). Assuming that entropic effects are negligible (that is,  $(\epsilon - \sigma_0 s) \gg 1$  and  $k_\sigma s \gg 1$ ), this condition corresponds to  $\phi < (\epsilon - \sigma_0 s)/k_\sigma s$ . We thus infer that PGCs naturally express relatively low levels of tube-forming proteins. This regime seems favorable from an evolutionary standpoint as it allows for PGCs to regulate their blebbing activity (and consequent motility) by modulating their N-BAR expression.

In the low  $\phi$  regime, our model attributes at least a part of the initial bleb expansion to membrane stretching (seizing area from membrane fluctuations rather than from stabilized tubes, see Figs. 1 c and 2, a1 and a2). That being said, our experiments have suggested that bleb growth is concomitant with the local flattening of the membrane tubes (21). Yet, because the blebs form very rapidly and the spatiotemporal resolution of our imaging is limited, one cannot conclude from these observations that the mere onset of the bleb must rely strictly on tube flattening. Our model suggests that even if the bleb expands purely via stretching throughout the initial nucleation stage, it should enter a tube-flattening mode very quickly after nucleation. This is because the tension increases with bleb expansion (see Eq. 1), and when  $\sigma s \approx \epsilon$ , it becomes energetically preferable to draw area from the tubular reservoir. Tube flattening is triggered by bleb expansion when the expansion area reaches the following:

$$\Delta S_b \approx \Delta S_b^{\text{flat}} \equiv A \left( \frac{\epsilon - \sigma_0 s}{k_\sigma s} - \phi \right) \approx 4\pi R_{\text{cell}}^2 \left( \frac{\epsilon - \sigma_0 s}{k_\sigma s} - \phi \right) \quad (14)$$

Note that our assumption is  $\Delta S_b^{\text{nuc}} < \Delta S_b^{\text{flat}}$ , which translates into  $J < PR_{\text{cell}} \sqrt{(\epsilon - \sigma_0 s)/k_\sigma s} - \phi$ .

For high protein surface fraction,  $\phi > (\epsilon - \sigma_0 s)/k_\sigma s$ , our model predicts that the expansion via tube flattening (rather than stretching fluctuations) will ensue immediately after membrane-cortex detachment (see Figs. 1 d and 3 b). Thus, the very inception of the bleb would necessarily correlate with the flattening of membrane tubes. As discussed above, this regime cannot correspond to the WT experimental case because it is inconsistent with the fact that N-BAR overexpression increases the number of tubes and

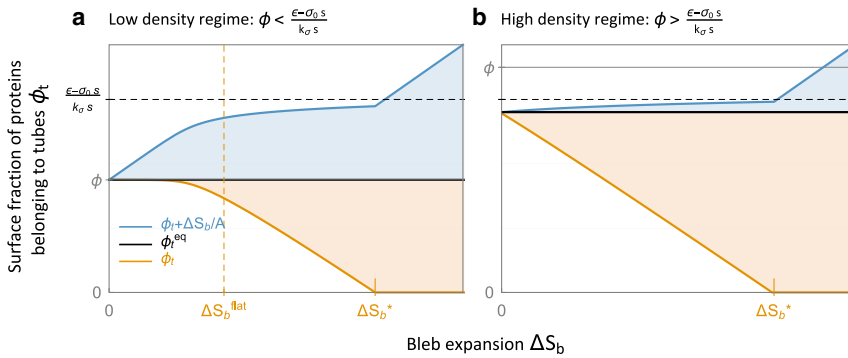

FIGURE 3 Area exchange during bleb expansion. In each plot, we present  $\phi_t^{\text{eq}}$  (black line),  $\phi_t$  in the bleb state (orange line), and  $\phi_t + \Delta S_b/A$  (blue line, also proportional to the tension,  $\sigma = \sigma_0 + k_\sigma(\phi_t + \Delta S_b/A)$ ) as functions of  $\Delta S_b$  (see Eq. 5). The vertical gap between the black and orange curves (light orange region) is proportional to the tube-flattened area, and the vertical gap between the blue and black curves (light blue region) is proportional to the stretched area (seized from membrane fluctuations). The dependence on parameters is indicated by the black dashed grid line (saturation limit of tubulation), the orange dashed grid line ( $\Delta S_b^{\text{flat}}$ , given in Eq. 14, beyond which the bleb expansion induces tube flattening), the

horizontal gray line (marking the total protein surface fraction  $\phi$ ), and the orange tick, which marks the critical bleb expansion,  $\Delta S_b^*$  (Eq. 13), beyond which  $\phi_t \approx 0$ . We vary the protein surface fraction  $\phi$ , such that the equilibrium tubulation is maximal in plot (a) ( $\phi_t^{\text{eq}} \approx \phi$ ), and saturated in plot (b) ( $\phi_t^{\text{eq}} \approx (\epsilon - \sigma_0 s)/k_\sigma s$ ). We set  $(\epsilon - \sigma_0 s) = 30$  and  $k_\sigma s = 50$  as in Fig. 2, a1 and a2. To see this figure in color, go online.

### Prediction and new supporting experiments

For all parameter regimes, the minimized bleb energy has a maximum as a function of  $S_b$ . This maximum corresponds to a finite bleb nucleation energy,  $E_b^{\text{nuc}}$  (given in Eq. 12), which tends to saturate as a function of  $\phi$  but is always proportional to  $1/P^2$ . In other words, the stabilizing effect of the tubulating proteins is limited, whereas the destabilizing effect of the hydrostatic pressure is not. We may conclude then that regardless of  $\phi$ , one can continuously increase the probability of bleb formation (proportional to  $e^{-E_b^{\text{nuc}}}$ ) by gradually increasing  $P$  (see Fig. 4 a).

To test this prediction, we conducted a complementary study using zebrafish PGCs as an in vivo model. The

experimental methods are similar to those reported in (21) (see Supporting Materials and Methods for details). In these new experiments, we first inhibited the blebbing activity by overexpressing the N-BAR domain of amphiphysin (Amph-N-BAR) specifically in the PGCs. We then expressed in these embryos varying concentrations of constitutively active MLCK (CA-MLCK), the enzyme which enhances myosin II contraction. Because the myosin contraction is known to increase the hydrostatic pressure, we expected to first rescue blebbing and then to increase the blebbing frequency as a function of the CA-MLCK concentration. Indeed, although we were not able to measure the pressure directly, our results show the expected trend (see Fig. 4 b). After this manipulation, the blebbing frequency of cells overexpressing Amph-N-BAR recovered to WT levels. Furthermore, by overexpressing the CA-MLCK protein,

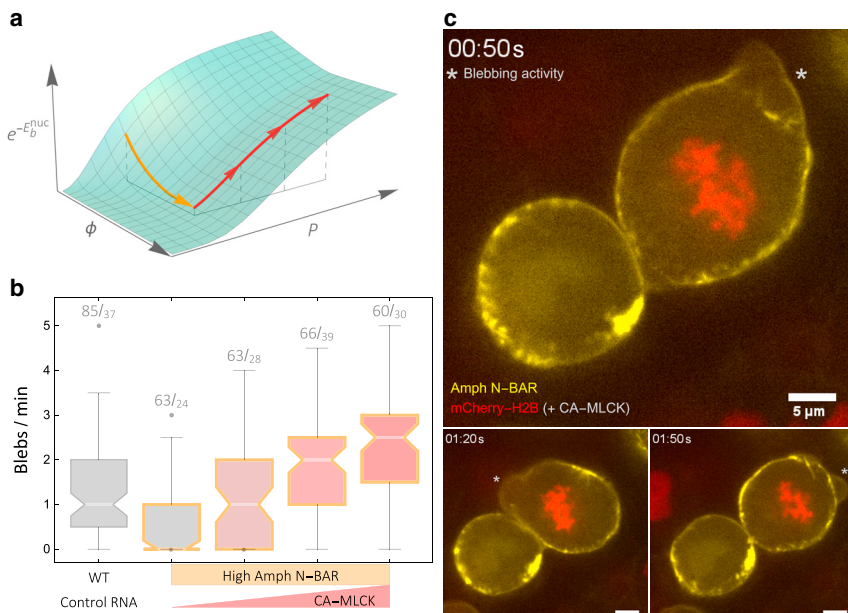

FIGURE 4 Blebbing recovery in Amph N-BAR PGCs through CA-MLCK expression. (a) Shown is a plot of the theoretical probability of bleb formation, proportional to  $e^{-E_b^{\text{nuc}}}$ , as a function of the protein surface fraction  $\phi$  and the hydrostatic pressure  $P$  (see Eq. 12). The arrows indicate the qualitative direction of the theoretically motivated manipulations. (b) Box whisker plot (with outliers) summarizes the in vivo blebbing frequency of WT and manipulated PGCs. White lines denote medians (with notched confidence interval), and each box extends from the 25% to the 75% quantile. Boxes with orange edges indicate datasets of cells expressing 250 pg of N-BAR domain of amphiphysin (Amph-N-BAR), and the red level fillings indicates the increasing levels of CA-MLCK (from 0 to 40 pg). Numbers indicate the number of cells quantified over the number of manipulated embryos. (c) Snapshots from Video S1 show a mosaic of cells that are overexpressing N-BAR (yellow). In contrast to the stable cell on the left, the blebbing cell on the right also expresses CA-MLCK. Blebbing activity is marked with asterisks, and the nuclear marker (mCherry-H2B) was used to tag cells that co-express both N-BAR and CA-MLCK. To see this figure in color, go online.

we were able to increase the blebbing activity beyond that observed in WT cells, which is also qualitatively consistent with the model. The recovery of blebbing in Amph-N-BAR PGCs by CA-MLCK overexpression is demonstrated in Fig. 4 c and Video S1. Here, two PGCs expressing elevated levels of Amph-N-BAR are presented (yellow label). One of the PGCs was engineered to express CA-MLCK (cell expressing mCherry in its nucleus), and this cell produces blebs (marked by asterisks).

## DISCUSSION

Our derivation of  $E_b^{\text{nuc}}$  (see Eq. 12) shows how the bleb initiation probability scales with physical parameters, including the intracellular hydrostatic pressure (driven by actomyosin contractility), the membrane-cortex adhesion strength, and the fluctuations-driven membrane tension (8). We claim that bleb nucleation is controlled by the curved membrane proteins (N-BAR domains) through their capacity to control membrane tension by sequestering membrane area into tubular invaginations. Although a quantitative comparison with experiments remains limited, mostly due to the lack of precise independent measurements of our model parameters for this cell type, our theoretical results do provide a qualitative explanation of the observed responses of PGCs to manipulations in the level of the Amph-N-BAR and in the activity of the myosin light-chain kinase (MLCK) enzyme that induces actomyosin contraction. Indeed, increasing MLCK activity in WT somatic cells that do not normally bleb led to bleb formation in these cells (25). It would thus be interesting to examine this option in different cell types and at different steps, such as at the initiation of migration, during migration, and at the stage when the cells stop migration.

For simplicity, we have discarded possible couplings between the membrane-cortex adhesion strength,  $J$ ; the density of the curved proteins,  $\phi/s$ ; and their aggregation energy,  $\varepsilon$ . However, a complex co-dependence between these factors is likely to arise because the tubes were observed to penetrate the cortex. Moreover, we found experimentally that tube flattening was mostly confined to the cortex-detached region of the expanding bleb (that is, tubes in distant parts of the membrane remained intact). This phenomenon could result from a possible stabilization of membrane tubes over the cortex-bound membrane through their interaction with cytoskeleton components. This could be taken into account in the model by assigning a larger value of the energy  $\varepsilon$  for tubes embedded in the cortex. Another possibility is that the increase of membrane tension after bleb expansion fails to propagate over the entire cell membrane because of friction with the cytoskeleton as was recently observed in HeLa cells (37). Such dynamical effects may be crudely accounted for in our equilibrium theory through the area  $A$  over which the tension is assumed to be uniform. If tension equilibrates fast compared to bleb

expansion,  $A$  is the total cell area as was assumed in Eqs. 13 and 14. If friction over the cytoskeleton effectively prevents tension equilibration away from the growing bleb,  $A$  is equivalent to the cortex-detached area  $S_b$ . The only relevant parameters that depend on this area are the tension increase during bleb expansion  $\Delta\sigma_{\text{bleb}} = k_\sigma(\Delta S_b/A)$  (see Eq. 1) and the total area stored in tubes  $S_t = A\phi$ . Restricting tension propagation to the cortex-detached bleb membrane thus has two consequences: the bleb membrane tension increases much faster during bleb expansion and is more likely to reach the threshold tension at which tubes flatten, and tube flattening is restricted to the bleb membrane. Both consequences are in agreement with our observations.

Because of the fairly high uncertainty of the parameter values, precise quantitative predictions are beyond the scope of our model. We may nevertheless propose a realistic scenario based on our experimental evidence. In the context of our model, the inhibitory effect of N-BAR overexpression on bleb formation is evidence that WT PGCs are in the maximal tubulation regime (Fig. 1 a). Membrane tension is thus below a threshold set by the affinity of N-BAR proteins to tubular structures and the protein size:  $\sigma_{\text{WT}} < (\varepsilon/s) \sim 1\text{pN/nm}$  (with  $\varepsilon = 10\text{ k}_\text{B}\text{T}$  and  $s = 50\text{ nm}^2$ , see Table 1). In this regime, increasing the protein density by an amount  $\Delta\phi$  leads to a relative increase of tension  $(\Delta\sigma/\sigma) = (k_\sigma/\sigma)\Delta\phi$ . Because N-BAR overexpression strongly decreases the blebbing rate, we may expect that it leads to a large variation of the bleb nucleation energy (Eq. 12)  $(\Delta E_b^{\text{nuc}}/E_b^{\text{nuc}}) = (\Delta\sigma/\sigma) \sim 1$ . As we do not expect the protein surface fraction to be much larger than  $\Delta\phi = 0.1$ , this requires that  $k_\sigma$  is one order of magnitude larger than  $\sigma$ , which is consistent with our estimates (Table 1). We have shown that increasing actomyosin contractility can compensate for the effect of N-BAR overexpression on blebbing. According to Eq. 12, this requires that  $(\Delta P/P) \sim (\Delta\sigma/2\sigma) \sim (1/2)$ . An increase of contractility by 50% is indeed a reasonable outcome of CA-MLCK overexpression.

## CONCLUSIONS

Together, we have presented a comprehensive coarse-grained theory of bleb initiation and membrane tubulation by curved proteins, such as N-BAR domains. In this theory, the tubes control the rate of bleb formation by increasing the cell membrane tension. When the blebbing rate is sensitive to N-BAR expression, as in the case of WT PGCs, we infer from our model that the membrane reservoir contained in the tubes remains mostly folded during the nucleation stage of the bleb. We propose that the flattening of tubes is prompted when the energetic cost of stretching out fluctuations exceeds the free energy cost of dispersing the dense protein scaffolds that form the tubes. This unfolding mode is likely triggered at a later stage of bleb growth because the bleb expansion itself also increases the membrane tension. The

results obtained in our description of the tubes at rest (that is, without a bleb) shed light on a more generic regulatory role for the curved membrane proteins. We suggest that these proteins significantly impact the tension by folding the cell membrane and could thus influence any cellular process in which membrane mechanics play an important role. The relevance of our findings is thus particularly broad as membrane tension is increasingly being regarded as a master regulator of important cellular process, such as cell motility (36,55,56) and cell spreading (57,58).

## SUPPORTING MATERIAL

Supporting Material can be found online at <https://doi.org/10.1016/j.bpj.2019.08.002>.

## AUTHOR CONTRIBUTIONS

I.L. wrote the article and analyzed the model with N.S.G., R.V., and P.S. M.G. and E.R. designed and performed the experiments. P.S. supervised the theoretical work and edited the manuscript. All authors reviewed the manuscript.

## ACKNOWLEDGMENTS

I.L. acknowledges support from the doctoral program “Interface pour le Vivant” at the Sorbonne University. E.R. and M.G. were supported by the European Research Council (ERC, CellMig 268806), the Deutsche Forschungsgemeinschaft (RA863/11-1), the IZKF Muenster (Raz2/021/16), and the Cells In Motion Cluster of Excellence (EXC 1003-CIM). N.S.G. is the incumbent of the Lee and William Abramowitz Professorial Chair of Biophysics and acknowledges support from the ISF (1459/17). P.S. acknowledges the support of Agence National pour la Recherche (ANR-14-CE09-0008).

## REFERENCES

- Albrecht-Buehler, G. 1982. Does blebbing reveal the convulsive flow of liquid and solutes through the cytoplasmic meshwork? *Cold Spring Harb. Symp. Quant. Biol.* 46:45–49.
- Charras, G. T., J. C. Yarrow, ..., T. J. Mitchison. 2005. Non-equilibration of hydrostatic pressure in blebbing cells. *Nature*. 435:365–369.
- Cunningham, C. C. 1995. Actin polymerization and intracellular solvent flow in cell surface blebbing. *J. Cell Biol.* 129:1589–1599.
- Keller, H., and P. Eggli. 1998. Protrusive activity, cytoplasmic compartmentalization, and restriction rings in locomoting blebbing Walker carcinoma cells are related to detachment of cortical actin from the plasma membrane. *Cell Motil. Cytoskeleton*. 41:181–193.
- Paluch, E., M. Piel, ..., C. Sykes. 2005. Cortical actomyosin breakage triggers shape oscillations in cells and cell fragments. *Biophys. J.* 89:724–733.
- Pullarkat, P. A. 2006. Loss of cell-substrate adhesion leads to periodic shape oscillations in fibroblasts. *arXiv*, arXiv physics/0612156 <https://arxiv.org/abs/physics/0612156>.
- Paluch, E. K., and E. Raz. 2013. The role and regulation of blebs in cell migration. *Curr. Opin. Cell Biol.* 25:582–590.
- Charras, G. T., M. Coughlin, ..., L. Mahadevan. 2008. Life and times of a cellular bleb. *Biophys. J.* 94:1836–1853.
- Norman, L. L., J. Brugués, ..., H. Aranda-Espinoza. 2010. Cell blebbing and membrane area homeostasis in spreading and retracting cells. *Biophys. J.* 99:1726–1733.
- Spangler, E. J., C. W. Harvey, ..., M. Laradji. 2011. Computer simulation of cytoskeleton-induced blebbing in lipid membranes. *Phys. Rev. E Stat. Nonlin. Soft Matter Phys.* 84:051906.
- Strychalski, W., and R. D. Guy. 2013. A computational model of bleb formation. *Math. Med. Biol.* 30:115–130.
- Alert, R., and J. Casademunt. 2016. Bleb nucleation through membrane peeling. *Phys. Rev. Lett.* 116:068101.
- Fang, C., T. H. Hui, ..., Y. Lin. 2017. A combined experimental and theoretical investigation on cellular blebbing. *Sci. Rep.* 7:16666.
- Kleinschmidt, J. H. 2006. Folding kinetics of the outer membrane proteins OmpA and FomA into phospholipid bilayers. *Chem. Phys. Lipids*. 141:30–47.
- Kwok, R., and E. Evans. 1981. Thermoelasticity of large lecithin bilayer vesicles. *Biophys. J.* 35:637–652.
- Sheetz, M. P., J. E. Sable, and H. G. Döbereiner. 2006. Continuous membrane-cytoskeleton adhesion requires continuous accommodation to lipid and cytoskeleton dynamics. *Annu. Rev. Biophys. Biomol. Struct.* 35:417–434.
- Dai, J., M. P. Sheetz, ..., C. E. Morris. 1998. Membrane tension in swelling and shrinking molluscan neurons. *J. Neurosci.* 18:6681–6692.
- Erickson, C. A., and J. P. Trinkaus. 1976. Microvilli and blebs as sources of reserve surface membrane during cell spreading. *Exp. Cell Res.* 99:375–384.
- Schmid-Schönbein, G. W., Y. Y. Shih, and S. Chien. 1980. Morphometry of human leukocytes. *Blood*. 56:866–875.
- Young, J., and S. Mitran. 2010. A numerical model of cellular blebbing: a volume-conserving, fluid-structure interaction model of the entire cell. *J. Biomech.* 43:210–220.
- Goudarzi, M., K. Tarbashevich, ..., E. Raz. 2017. Bleb expansion in migrating cells depends on supply of membrane from cell surface invaginations. *Dev. Cell*. 43:577–587.e5.
- Barton, L. J., M. G. LeBlanc, and R. Lehmann. 2016. Finding their way: themes in germ cell migration. *Curr. Opin. Cell Biol.* 42:128–137.
- Paksa, A., and E. Raz. 2015. Zebrafish germ cells: motility and guided migration. *Curr. Opin. Cell Biol.* 36:80–85.
- Blaser, H., M. Reichman-Fried, ..., E. Raz. 2006. Migration of zebrafish primordial germ cells: a role for myosin contraction and cytoplasmic flow. *Dev. Cell*. 11:613–627.
- Goudarzi, M., T. U. Banisch, ..., E. Raz. 2012. Identification and regulation of a molecular module for bleb-based cell motility. *Dev. Cell*. 23:210–218.
- Takei, K., V. I. Slepnev, ..., P. De Camilli. 1999. Functional partnership between amphiphysin and dynamin in clathrin-mediated endocytosis. *Nat. Cell Biol.* 1:33–39.
- Lee, E., M. Marcucci, ..., P. De Camilli. 2002. Amphiphysin 2 (Bin1) and T-tubule biogenesis in muscle. *Science*. 297:1193–1196.
- Peter, B. J., H. M. Kent, ..., H. T. McMahon. 2004. BAR domains as sensors of membrane curvature: the amphiphysin BAR structure. *Science*. 303:495–499.
- Masuda, M., S. Takeda, ..., N. Mochizuki. 2006. Endophilin BAR domain drives membrane curvature by two newly identified structure-based mechanisms. *EMBO J.* 25:2889–2897.
- McMahon, H. T., and J. L. Gallop. 2005. Membrane curvature and mechanisms of dynamic cell membrane remodelling. *Nature*. 438:590–596.
- Itoh, T., and P. De Camilli. 2006. BAR, F-BAR (EFC) and ENTH/ANTH domains in the regulation of membrane-cytosol interfaces and membrane curvature. *Biochim. Biophys. Acta*. 1761:897–912.
- Baumgart, T., B. R. Capraro, ..., S. L. Das. 2011. Thermodynamics and mechanics of membrane curvature generation and sensing by proteins and lipids. *Annu. Rev. Phys. Chem.* 62:483–506.

33. Simunovic, M., G. A. Voth, ..., P. Bassereau. 2015. When physics takes over: BAR proteins and membrane curvature. *Trends Cell Biol.* 25:780–792.
34. Bhatia, V. K., K. L. Madsen, ..., D. Stamou. 2009. Amphipathic motifs in BAR domains are essential for membrane curvature sensing. *EMBO J.* 28:3303–3314.
35. Evans, E., and W. Rawicz. 1990. Entropy-driven tension and bending elasticity in condensed-fluid membranes. *Phys. Rev. Lett.* 64:2094–2097.
36. Sens, P., and J. Plastino. 2015. Membrane tension and cytoskeleton organization in cell motility. *J. Phys. Condens. Matter.* 27:273103.
37. Shi, Z., Z. T. Graber, ..., A. E. Cohen. 2018. Cell membranes resist flow. *Cell.* 175:1769–1779.e13.
38. Gov, N., and S. A. Safran. 2004. Pinning of fluid membranes by periodic harmonic potentials. *Phys. Rev. E Stat. Nonlin. Soft Matter Phys.* 69:011101.
39. Sens, P., L. Johannes, and P. Bassereau. 2008. Biophysical approaches to protein-induced membrane deformations in trafficking. *Curr. Opin. Cell Biol.* 20:476–482.
40. Kabaso, D., E. Gongadze, ..., A. Iglič. 2011. Attachment of rod-like (BAR) proteins and membrane shape. *Mini Rev. Med. Chem.* 11:272–282.
41. Lipowsky, R. 2013. Spontaneous tubulation of membranes and vesicles reveals membrane tension generated by spontaneous curvature. *Faraday Discuss.* 161:305–331, discussion 419–459.
42. Schweitzer, Y., and M. M. Kozlov. 2015. Membrane-mediated interaction between strongly anisotropic protein scaffolds. *PLoS Comput. Biol.* 11:e1004054.
43. Blood, P. D., and G. A. Voth. 2006. Direct observation of Bin/amphiphysin/Rvs (BAR) domain-induced membrane curvature by means of molecular dynamics simulations. *Proc. Natl. Acad. Sci. USA.* 103:15068–15072.
44. Ayton, G. S., P. D. Blood, and G. A. Voth. 2007. Membrane remodeling from N-BAR domain interactions: insights from multi-scale simulation. *Biophys. J.* 92:3595–3602.
45. Ayton, G. S., E. Lyman, ..., G. A. Voth. 2009. New insights into BAR domain-induced membrane remodeling. *Biophys. J.* 97:1616–1625.
46. Arkhipov, A., Y. Yin, and K. Schulten. 2009. Membrane-bending mechanism of amphiphysin N-BAR domains. *Biophys. J.* 97:2727–2735.
47. Yin, Y., A. Arkhipov, and K. Schulten. 2009. Simulations of membrane tubulation by lattices of amphiphysin N-BAR domains. *Structure.* 17:882–892.
48. Simunovic, M., A. Srivastava, and G. A. Voth. 2013. Linear aggregation of proteins on the membrane as a prelude to membrane remodeling. *Proc. Natl. Acad. Sci. USA.* 110:20396–20401.
49. Noguchi, H. 2016. Membrane tubule formation by banana-shaped proteins with or without transient network structure. *Sci. Rep.* 6:20935.
50. Shi, Z., and T. Baumgart. 2015. Membrane tension and peripheral protein density mediate membrane shape transitions. *Nat. Commun.* 6:5974.
51. Sorre, B., A. Callan-Jones, ..., A. Roux. 2012. Nature of curvature coupling of amphiphysin with membranes depends on its bound density. *Proc. Natl. Acad. Sci. USA.* 109:173–178.
52. Chen, Z., C. Zhu, ..., T. Baumgart. 2016. The N-terminal amphipathic helix of endophilin does not contribute to its molecular curvature generation capacity. *J. Am. Chem. Soc.* 138:14616–14622.
53. Gallop, J. L., C. C. Jao, ..., H. T. McMahon. 2006. Mechanism of endophilin N-BAR domain-mediated membrane curvature. *EMBO J.* 25:2898–2910.
54. Sens, P., and M. S. Turner. 2004. Theoretical model for the formation of caveolae and similar membrane invaginations. *Biophys. J.* 86:2049–2057.
55. Keren, K. 2011. Cell motility: the integrating role of the plasma membrane. *Eur. Biophys. J.* 40:1013–1027.
56. Diz-Muñoz, A., D. A. Fletcher, and O. D. Weiner. 2013. Use the force: membrane tension as an organizer of cell shape and motility. *Trends Cell Biol.* 23:47–53.
57. Raucher, D., and M. P. Sheetz. 2000. Cell spreading and lamellipodial extension rate is regulated by membrane tension. *J. Cell Biol.* 148:127–136.
58. Gauthier, N. C., M. A. Fardin, ..., M. P. Sheetz. 2011. Temporary increase in plasma membrane tension coordinates the activation of exocytosis and contraction during cell spreading. *Proc. Natl. Acad. Sci. USA.* 108:14467–14472.
59. Adam, J., N. Basnet, and N. Mizuno. 2015. Structural insights into the cooperative remodeling of membranes by amphiphysin/BIN1. *Sci. Rep.* 5:15452.
60. Lieber, A. D., S. Yehudai-Resheff, ..., K. Keren. 2013. Membrane tension in rapidly moving cells is determined by cytoskeletal forces. *Curr. Biol.* 23:1409–1417.
61. Brückner, B. R., and A. Janshoff. 2015. Elastic properties of epithelial cells probed by atomic force microscopy. *Biochim. Biophys. Acta.* 1853:3075–3082.
62. Schweitzer, Y., T. Shemesh, and M. M. Kozlov. 2015. A model for shaping membrane sheets by protein scaffolds. *Biophys. J.* 109:564–573.
63. Nagle, J. F., M. S. Jablin, ..., K. Akabori. 2015. What are the true values of the bending modulus of simple lipid bilayers? *Chem. Phys. Lipids.* 185:3–10.
64. Picas, L., F. Rico, and S. Scheuring. 2012. Direct measurement of the mechanical properties of lipid phases in supported bilayers. *Biophys. J.* 102:L01–L03.

**Biophysical Journal, Volume 117**

**Supplemental Information**

**Cellular Blebs and Membrane Invaginations Are Coupled through Membrane Tension Buffering**

**Ido Lavi, Mohammad Goudarzi, Erez Raz, Nir S. Gov, Raphael Voituriez, and Pierre Sens**

## Supporting Information Text

**Minimization of  $\Delta F_t$ .** We derive main Eq.(2) with respect to the densities of isolated proteins and tubes

$$\partial_{\rho_1} F_t = A (\log \rho_1 s + \mu) + \partial_{\rho_1} I_\sigma, \quad \partial_{\rho_p} F_t = A (\log \rho_p s + E_{\text{cap}} - \epsilon p + \mu p) + \partial_{\rho_p} I_\sigma \quad [\text{S1}]$$

where  $I_\sigma$  denotes the tension integral in Eq.(2):

$$I_\sigma = \int_0^{S_t + \Delta S_b} \left( \sigma_0 + k_\sigma \frac{S}{A} \right) dS = \sigma_0 (S_t + \Delta S_b) + k_\sigma \frac{(S_t + \Delta S_b)^2}{2A}. \quad [\text{S2}]$$

Since  $S_t = A \sum_{p \geq p_c} \rho_p p s$ , we find that:

$$\partial_{\rho_1} I_\sigma = 0, \quad \partial_{\rho_p} I_\sigma = \left( \sigma_0 + k_\sigma \frac{S_t + \Delta S_b}{A} \right) A p s = A \sigma_p s \quad [\text{S3}]$$

where we used Eq.(1).

We obtain Eq.(3) by inserting Eq.(S3) back in Eq.(S1) and solving  $0 = \partial_{\rho_1} F_t$ ,  $0 = \partial_{\rho_p} F_t$ .

**High  $E_{\text{cap}}$  limit.** We begin by restating main Eq.(4): the conservation of the total protein number

$$\phi = \phi_1 + \phi_t = e^{-\mu} + e^{-E_{\text{cap}}} \frac{e^{(1-p_c)(-\epsilon+\sigma s+\mu)} (1 + (e^{-\epsilon+\sigma s+\mu} - 1)p_c)}{(e^{-\epsilon+\sigma s+\mu} - 1)^2} \quad [\text{S4}]$$

where  $\sigma = \sigma_0 + k_\sigma (\phi - e^{-\mu}) + k_\sigma \Delta S_b / A$ .

In the limit  $E_{\text{cap}} \gg 1$ , the total protein surface fraction is dominated either by the fraction of isolated proteins ( $\phi \simeq \phi_1$ ) or the fraction of proteins in tubes ( $\phi \simeq \phi_t$ ). In these asymptotic limits we obtain

$$\mu_{\phi \simeq \phi_1} = -\log \phi \quad [\text{S5}]$$

$$\mu_{\phi \simeq \phi_t} = \epsilon - \sigma_0 s - k_\sigma s \Delta S_b / A - k_\sigma s \phi + \log x_{p_c} + W \left( k_\sigma s x_{p_c}^{-1} e^{-\epsilon + \sigma_0 s + k_\sigma s \Delta S_b / A + k_\sigma s \phi} \right) \quad [\text{S6}]$$

where  $x_{p_c}$  is the largest real root of

$$f_{p_c}(x) = p_c - 1 - p_c x + \phi e^{E_{\text{cap}}} x^{p_c-1} (1 - 2x + x^2). \quad [\text{S7}]$$

The protein surface fraction belonging to tubes is then

$$\phi_t = \phi - e^{-\mu} \simeq \begin{cases} 0 & \phi < \phi^* \\ \phi - \frac{1}{k_\sigma s} W \left( k_\sigma s x_{p_c}^{-1} e^{-k_\sigma s \left( \frac{\epsilon - \sigma_0 s}{k_\sigma s} - \frac{\Delta S_b}{A} - \phi \right)} \right) & \phi > \phi^* \end{cases} \quad [\text{S8}]$$

where  $\phi^*$  marks the crossover point between the two asymptotic limits, defined implicitly by  $\mu_{\phi \simeq \phi_1} = \mu_{\phi \simeq \phi_t}$ .

We can infer from Eq.(S7) that  $x_{p_c} \rightarrow 1$  when  $\phi e^{E_{\text{cap}}} \gg 1$ . Substituting  $x_{p_c} = 1$  back in Eq.(S6), we obtain the following approximation of the crossover point  $\phi^*$

$$\phi^* \simeq e^{-(\epsilon - \sigma_0 s - k_\sigma s \Delta S_b / A)}. \quad [\text{S9}]$$

With  $E_{\text{cap}}$  being larger than  $\epsilon$  in our estimation (Table 1), it is clear that  $\phi^* e^{E_{\text{cap}}}$  can be quite large. Hence, for  $\phi > \phi^*$  (the second asymptotic limit in Eq.(S8)), we also infer that  $\phi e^{E_{\text{cap}}}$  is large enough to justify our approximation of  $x_{p_c} \approx 1$  and  $\phi^*$ , Eq.(S9). We present this reduced approximation in Eqs.(5,6) of the main text.

Note that, in the simple case  $p_c = 1$  we can derive  $x_1$  and the corresponding  $\phi^*$  analytically:

$$x_1 = \frac{1 + 2\phi^{E_{\text{cap}}} + \sqrt{4\phi^{E_{\text{cap}}} + 1}}{2\phi^{E_{\text{cap}}}}, \quad \phi^* = e^{-(\epsilon - \sigma_0 s - k_\sigma s \Delta S_b / A)} - e^{-(E_{\text{cap}} + \epsilon - \sigma_0 s - k_\sigma s \Delta S_b / A)/2}. \quad [\text{S10}]$$

As expected, this result converges to  $x_1 \rightarrow 1$  and Eq.(S9) when  $E_{\text{cap}} \gg 1$ .

To further test the validity of our explicit approximation, we contrast it in Fig.S1 with direct numerical solutions of Eq.(S4) at different values of  $E_{\text{cap}}$  and  $p_c$ . These plots consistently show convergence to our reduced piecewise approximation as we increase  $E_{\text{cap}}$ .

**High temperature limit.** For  $\epsilon \rightarrow 0$ ,  $\sigma_0 s \rightarrow 0$ ,  $k_\sigma s \rightarrow 0$  and  $E_{\text{cap}} \rightarrow 0$  we find that Eq.(S4) reduces to

$$\phi = e^{-\mu} + \frac{e^{(1-p_c)\mu} (1 + (e^\mu - 1)p_c)}{(e^\mu - 1)^2} \quad [\text{S11}]$$

and thus  $\mu = \log y_{p_c}$ , where  $y_{p_c}$  is the largest real root of

$$g_{p_c}(y) = p_c - 1 - p_c y - y^{p_c-2} + (2 + \phi)y^{p_c-1} - (1 + 2\phi)y^{p_c} + \phi y^{p_c+1}. \quad [\text{S12}]$$

In Fig.S2, we plot  $\phi_t = \phi - e^{-\mu} = \phi - y_{p_c}^{-1}$  for different values of  $p_c$ . Here,  $\phi_t$  is the surface fraction of proteins belonging to tubes that maximizes the entropy,  $-A \left( \rho_1 \log \frac{\rho_1 s}{e} + \sum_{p \geq p_c} \rho_p \log \frac{\rho_p s}{e} \right)$ , under the constraint of a fixed total number of membrane-bound proteins. For  $p_c = 1$  (red line in Fig.S2), we find that  $\phi_t \geq \phi/2$  because tubes of size  $p = 1$  already have the same entropic weight as that of isolated proteins. For  $p_c > 1$ , and given low  $\phi$ , the translational entropy favors isolated proteins over those clustered in tubular aggregates. However, since the entropy dependence on  $\rho_1$  and  $\rho_p$  is concave, entropy could be gained – at high  $\phi$  – by converting  $p_c$  isolated proteins into a single tube (a gain associated to mixing distinguishable densities). The larger  $p_c$ , the higher is the protein concentration required for such aggregation to increase the entropy (see green and blue lines in Fig.S2). In our simplified model, such entropy-driven clustering also produces tubes. In effect, this is a non-physical result that follows from our assumption that all protein aggregates necessarily produce tubes, an assumption that should break down at the high  $T$  limit. We stress that in the main text we focus only on the physical regime in which tubulation is driven by  $\epsilon$  (the binding/bending energy gained per curved protein recruited to a tube).

**Simplifying the minimized free energy.** Let us consider  $F_t$ , Eq.(2), minimized with respect to  $\rho_1, \rho_p$  (which are then given by Eq.(3))

$$F_t = A \rho_1 \log \frac{\rho_1 s}{e} + A \sum_p \rho_p \left( \log \frac{\rho_p s}{e} + E_{\text{cap}} \right) + A \sum_p \rho_p p (-\epsilon + \sigma_0 s) + \sigma_0 \Delta S_b + A \frac{k_\sigma}{2} \left( \sum_p \rho_p p s + \frac{\Delta S_b}{A} \right)^2 \quad [\text{S13}]$$

where we omitted the Lagrange multiplier term in Eq.(2) which does not contribute to the real free energy.

We prefer to express  $F_t$  in terms of the protein surface fractions  $\phi_1, \phi_t$ , which we already characterized as simpler explicit functions of  $\Delta S_b$ , Eq.(5). Since  $\phi_1 = \rho_1 s$  and  $\phi_t = \sum_p \rho_p p s$ , it is easy to find that Eq.(S13) translates to

$$F_t = \frac{A}{s} \left( \phi_1 \log \frac{\phi_1}{e} + \sum_p \rho_p s \left( \log \frac{\rho_p s}{e} + E_{\text{cap}} \right) + (-\epsilon + \sigma_0 s) \phi_t + \sigma_0 s \frac{\Delta S_b}{A} + \frac{k_\sigma s}{2} \left( \phi_t + \frac{\Delta S_b}{A} \right)^2 \right) \quad [\text{S14}]$$

The remaining sum over  $\rho_p$  in Eq.(S14) accounts for terms that contribute solely to the free energy of tubes (rather than the energy of proteins). We recall that  $\rho_p$  is given in Eq.(3) by  $\rho_p = \frac{1}{s} e^{-E_{\text{cap}} - (-\epsilon + \sigma_0 s + \mu)p}$ , and thus

$$\begin{aligned} \sum_p \rho_p s \left( \log \frac{\rho_p s}{e} + E_{\text{cap}} \right) &= \sum_p \rho_p s ((\epsilon - \sigma_0 s - \mu)p - 1) = (\epsilon - \sigma_0 s - \mu) \phi_t - \frac{e^{-E_{\text{cap}}}}{e^{-\epsilon + \sigma_0 s + \mu} - 1} \\ &= (\epsilon - \sigma_0 s - k_\sigma s (\phi_t + \Delta S_b/A) + \log \phi_1) \phi_t - \frac{\phi_1 e^{-E_{\text{cap}}}}{e^{-\epsilon + \sigma_0 s + k_\sigma s (\phi_t + \Delta S_b/A)} - \phi_1} \end{aligned} \quad [\text{S15}]$$

where we substituted  $\sigma = \sigma_0 + k_\sigma (\phi_t + \Delta S_b/A)$  and  $\mu = -\log \phi_1$ . Eq.(S14) then amounts to

$$F_t = \frac{A}{s} \left( \phi \log \phi_1 - \phi_1 + \sigma_0 s \frac{\Delta S_b}{A} + \frac{k_\sigma s}{2} \left( \frac{\Delta S_b^2}{A^2} - \phi_t^2 \right) - \frac{\phi_1 e^{-E_{\text{cap}}}}{e^{-\epsilon + \sigma_0 s + k_\sigma s (\phi_t + \Delta S_b/A)} - \phi_1} \right) \quad [\text{S16}]$$

Since  $\phi_t = \phi - \phi_1$ , we calculate  $dF_t/d\Delta S_b$  as follows

$$\frac{dF_t}{d\Delta S_b} = \frac{\partial F_t}{\partial \Delta S_b} + \left( \frac{\partial F_t}{\partial \phi_1} - \frac{\partial F_t}{\partial \phi_t} \right) \frac{d\phi_1}{d\Delta S_b} \quad [\text{S17}]$$

where

$$\frac{\partial F_t}{\partial \Delta S_b} = \sigma_0 + k_\sigma \frac{\Delta S_b}{A} + k_\sigma \phi_1 \frac{e^{-E_{\text{cap}} - \epsilon + \sigma_0 s + k_\sigma s (\phi_t + \Delta S_b/A)}}{(e^{-\epsilon + \sigma_0 s + k_\sigma s (\phi_t + \Delta S_b/A)} - \phi_1)^2} \quad [\text{S18}]$$

$$\left( \frac{\partial F_t}{\partial \phi_1} - \frac{\partial F_t}{\partial \phi_t} \right) = \frac{A}{s} (k_\sigma s \phi_1 + 1) \left( \frac{\phi_t}{\phi_1} - \frac{e^{-E_{\text{cap}} - \epsilon + \sigma_0 s + k_\sigma s (\phi_t + \Delta S_b/A)}}{(e^{-\epsilon + \sigma_0 s + k_\sigma s (\phi_t + \Delta S_b/A)} - \phi_1)^2} \right) \quad [\text{S19}]$$

Recalling that  $\phi_1 \simeq \phi$  for  $\phi < \phi^*$ , and  $\phi_1 \simeq \frac{1}{k_\sigma s} W \left( k_\sigma s e^{-k_\sigma s \left( \frac{\epsilon - \sigma_0 s}{k_\sigma s} - \frac{\Delta S_b}{A} - \phi \right)} \right)$  for  $\phi > \phi^*$  (see Eq.(5)), we find

$$\frac{d\phi_1}{d\Delta S_b} \approx \begin{cases} 0 & \phi < \phi^* \\ \frac{1}{A} \left( \frac{k_\sigma s \phi_1}{k_\sigma s \phi_1 + 1} \right) & \phi > \phi^* \end{cases} \quad [S20]$$

Substituting Eqs.(S18-S20) in Eq.(S17) yields

$$\frac{dF_t}{d\Delta S_b} \approx \begin{cases} \sigma_0 + k_\sigma \frac{\Delta S_b}{A} + k_\sigma \phi \frac{e^{-E_{\text{cap}} - \epsilon + \sigma_0 s + k_\sigma s \Delta S_b / A}}{(e^{-\epsilon + \sigma_0 s + k_\sigma s \Delta S_b / A} - \phi)^2} & \phi < \phi^* \\ \sigma_0 + k_\sigma \left( \phi_t + \frac{\Delta S_b}{A} \right) & \phi > \phi^* \end{cases} \approx \begin{cases} \sigma_0 + k_\sigma \frac{\Delta S_b}{A} & \phi < \phi^* \\ \sigma_0 + k_\sigma \left( \phi_t + \frac{\Delta S_b}{A} \right) & \phi > \phi^* \end{cases} \quad [S21]$$

which, when evaluated at  $\Delta S_b = 0$ , gives

$$\left. \frac{dF_t}{d\Delta S_b} \right|_{\Delta S_b=0} \approx \begin{cases} \sigma_0 & \phi < \phi^* \\ \sigma_0 + k_\sigma \phi_t^{\text{eq}} & \phi > \phi^* \end{cases} = \sigma^{\text{eq}} \quad [S22]$$

**Defining the range of validity.** We recall that in our formulation of the bleb energy, Eq.(11), we assumed the shallow bleb limit, negligible bending energy induced by the bleb, and negligible change in tension during the bleb's nucleation stage. Given our results for the nucleation point,  $S_b^{\text{nuc}} = 8\pi\sigma^{\text{eq}}J/P^2$  and  $\Delta S_b^{\text{nuc}} = 4\pi J^2/P^2$ , we find that these assumptions correspond to Eqs.(S23-S25) respectively

$$\frac{\Delta S_b^{\text{nuc}}}{S_b^{\text{nuc}}} \ll 1 \quad \rightarrow J \ll 2(\sigma_0 + k_\sigma \phi_t^{\text{eq}}) \quad [S23]$$

$$S_b^{\text{nuc}} > \frac{K_c}{\sigma^{\text{eq}}} \quad \rightarrow J > \frac{K_c P^2}{8\pi(\sigma_0 + k_\sigma \phi_t^{\text{eq}})^2} \quad [S24]$$

$$k_\sigma \left( \frac{\Delta S_b^{\text{nuc}}}{A} \right)^2 \ll \sigma^{\text{eq}} \quad \rightarrow J^4 \ll P^4 R_{\text{cell}}^4 \left( \frac{\sigma_0}{k_\sigma} + \phi_t^{\text{eq}} \right) \quad [S25]$$

where  $\phi_t^{\text{eq}}$  is approximated in Eq.(7).

We stress that the range given in Eqs.(S23-S25) confers validity to the approximations used in the text to simplify the calculation of  $E_b^{\text{nuc}}$ , Eq.(12), but does not restrict the validity of our main conclusion. The contribution of the membrane bending energy is to disfavor small blebs, but it does not change the nucleation-and-growth nature of bleb formation. If tension increases in a sizable fashion during bleb growth, this could stall bleb formation for a particular bleb size in the absence of membrane tubes. In their presence, tension would increase only up to the value at which tubes flatten, and bleb nucleation would proceed under the conditions discussed in the main text.

## Experimental Methods

**Zebrafish work.** Zebrafish (*Danio rerio*) of the AB background and transgenic fish carrying the Tg(kop:mCherry-f-UTRnanos3) expressing mCherry on the membrane of PGCs (1) were used as the wild type. The fish were maintained on a 14-hour light/10-hour dark cycle, and fertilized eggs were collected and the embryos were raised at 25°C, 28°C or 32°C in 0.3x Danieau's solution [17.4mM NaCl, 0.21mM KCl, 0.12mM MgSO<sub>4</sub>·7H<sub>2</sub>O, 0.18mM Ca(NO<sub>3</sub>)<sub>2</sub>, 1.5mM HEPES (pH 7.6)]. The embryos used were of early developmental stages prior to sex determination. The maintenance of the fish was done according to the regulations of the LANUV NRW and was supervised by the veterinarian office of the city of Muenster.

**Spinning Disk (SD) microscopy.** Embryos were imaged using Carl Zeiss Axio imager Z1 microscope equipped with Yokogawa CSU X.1 spinning disk unit. Samples were maintained at 28°C using heated stage (PECON, TempController 2000-2). Imaging was performed using 63x NA=1.0 water immersion objective, Hamamatsu Orca flash 4.0 camera and Visitron Systems acquisition software (Visi-View2007-2011).

**RNA Expression and bleb frequency measurement.** mRNA was synthesized using the mMessage Machine kit (Ambion). RNAs were injected into the yolk of one-cell stage and then into one of the eight blastomeres of the 8-cell stage embryos. Injection of Amph-n-bar-yfp mRNA at one-cell stage leads to the expression of Amph-N-BAR-YFP in all primordial germ cells (the mRNA will be degraded in somatic cells but will be preserved and translated in primordial germ cells due to the presence of the nanos 3' untranslated region (2)). Subsequent injection

of the RNA into one cell at the 8-cell stage of the same embryos, resulted in the expression of RNAs encoding for CA-MLCK (0-10-20 and 40pg respectively) and mCherry-H2B in a sub population of PGCs. The experimental and control embryos were from same clutch of eggs (same parents). For the data presented in Fig.4b, Embryos from Tg(kop:mCherry-f-UTRnanos3) transgenic line were injected at one cell stage with 250pg of the Amph-n-bar-yfp mRNA and increasing amounts of mRNA encoding for CA-MLCK (0-10-20 and 40pg respectively). The PGCs were imaged in 18hpf embryos using a spinning disk microscope for 2 minutes, with 5 sec time intervals between time-points. Bleb frequency was measured manually using Fiji (ImageJ) software. The cell and embryo count from cumulative data of three independent experiments are as follow: WT (wildtype siblings: 85 cells from 37 embryos, 250pg Amph-n-bar-yfp mRNA (0pg Ca-mlck mRNA): 63 cells from 24 embryos, 250pg Amph-n-bar-yfp mRNA (10pg Ca-mlck mRNA): 63 cells from 28 embryos, 250pg Amph-n-bar-yfp mRNA (20pg Ca-mlck mRNA): 66 cells from 39 embryos, 250pg Amph-n-bar-yfp mRNA (40pg Ca-mlck mRNA): 60 cells from 30 embryos. For the Fig.4c and Movie S1 embryos of AB background were injected with 250pg mRNA encoding got Amph-N-BAR-YFP at the one cell stage. At the 8 cells stage, one of the distal blastomeres was co-injected with 100pg of mRNA encoding for CA-MLCK and 50pg of mRNA encoding for mCherry-H2B (3). The expression of mCherry-H2B in nuclei allowed the identification of cells that received also the ca-mlck mRNA. Imaging of the mosaic embryos was performed at 18hpf for 2minutes, with 5sec interval between the consecutive images.

**Statistical visualization.** Statistical test and visualization in Fig.4b was performed using the [BoxWhiskerChart](#) function in Mathematica (TM). Default options where used: in each box, the median is marked by the white horizontal line, notched edges extend the median confidence interval, box edges extend from the 25% quantile up to the 75% quantile, top and bottom fences extend the data range excluding outliers.

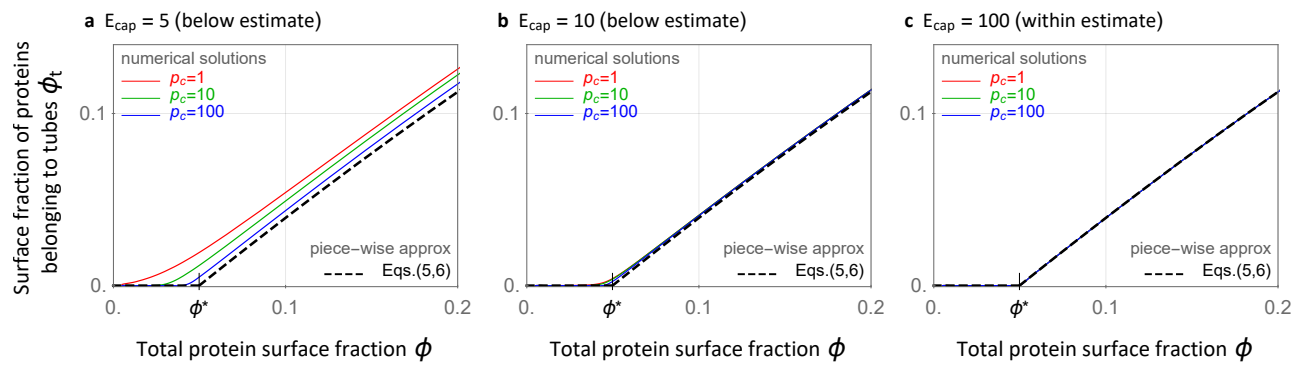

**Fig. S1. Numerical solutions vs piecewise approximation (convergence at high  $E_{cap}$ ).** Colored plots mark numerical solutions for the protein surface fraction belonging to tubes,  $\phi_t = \phi - e^{-\mu_N(\phi)}$ , where  $\mu_N(\phi)$  denotes the numerical solution to main Eq.(4) for the specified  $E_{cap}$  and  $p_c$ . Dashed black plot represents the explicit piecewise approximation (independent of  $E_{cap}$ ,  $p_c$ ) given in main Eq.(5), with  $\phi^*$  denoting the critical protein surface fraction for the onset of tubulation, Eq.(6). In all plots, we set  $(\epsilon - \sigma_0 s) = 3$  and  $k_{\sigma s} = 5$ , as in main Fig.1.b1. Note the convergence to our explicit approximation as  $E_{cap}$  falls within the estimated range for this parameter (see Table 1). Also note that when  $(\epsilon - \sigma_0 s) \gg 1$  and thus  $\phi^* \rightarrow 0$  (as in main Fig.1.a1), the approximation is even more precise, i.e., numerical solutions directly fall behind Eq.(5).

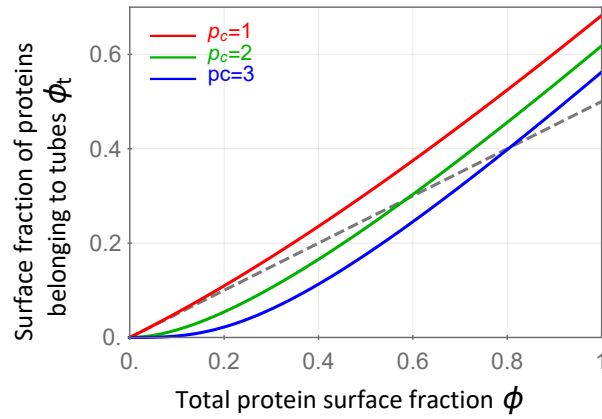

**Fig. S2. High temperature limit (non-physical, entropy-driven tubulation).** We plot the protein surface fraction belonging to tubes,  $\phi_t = \phi - e^{-\mu} = \phi - y_{p_c}^{-1}$  (finding the roots of Eq.(S12)), as a function of  $\phi$  for different values of  $p_c$ . This calculation of  $\phi_t$  maximizes the total translational entropy of isolated proteins and tubes while conserving the total number of membrane-bound proteins. Colored lines represent  $\phi_t$  while the gray dashed line represents  $\phi_t = \phi/2$  for reference.

**Movie S1.** Video showing two manipulated PGCs in the Zebrafish embryo. The stabilized non-blebbing cell on the left expresses high levels of the Amph-N-BAR protein (yellow), and no added CA-MLCK. The unstable blebbing cell on the right, identified via a nuclear marker (mCherry-H2B in red), expresses the same level of the N-BAR protein and also the constitutively active MLCK protein (CA-MLCK). See Methods for more details.

## References

1. Meyen D, et al. (2015) Dynamic filopodia are required for chemokine-dependent intracellular polarization during guided cell migration in vivo. *Elife* 4.
2. Köprunner M, Thisse C, Thisse B, Raz E (2001) A zebrafish nanos-related gene is essential for the development of primordial germ cells. *Genes & development* 15(21):2877–2885.
3. Paksa A, et al. (2016) Repulsive cues combined with physical barriers and cell–cell adhesion determine progenitor cell positioning during organogenesis. *Nature communications* 7:11288.
